## XY follicle cells in the ovaries of XO/XY and XO/XY/XYY mosaic mice

STEPHEN J. PALMER and PAUL S. BURGOYNE

MRC Mammalian Development Unit, 4 Stephenson Way, London NW1 2HE, UK

### Summary

XO/XY and XO/XY/XYY mosaic hermaphrodites were generated from crosses involving BALB/cWt males. The distribution of Y-bearing cells in the gonads of these mice was studied by *in situ* hybridisation using the Y-specific probe pY353B. XY cells were found to contribute to all cell lineages of the ovary including follicle cells. The proportion of XY follicle cells was not significantly different from the XY contribution to other gonadal or non-gonadal cell lineages. However, this proportion was consistently low, all the hermaphrodites having a low XY contribution to the animal as a whole.

Because the XO- and Y-bearing cell lineages are developmentally balanced, the XY follicle cells cannot have formed as a result of a 'mismatch' in which the Y-directed testis determination process is pre-empted by an early acting programme of ovarian development. These results are discussed with respect to the hypothesis that *Tdy* acts in the supporting cell lineage, the lineage from which Sertoli cells and follicle cells are believed to be derived.

Key words: mosaic, hermaphrodite, XY follicle cells.

### Introduction

Gonadal sex differentiation can first be recognised in mice at 12.5 days *post coitum* with the appearance of testicular cords in the gonads of XY fetuses. Female gonads show no gross morphological change from the indifferent state until 13.5 days *post coitum* when the germ cells first enter meiosis (McLaren, 1984). Studies on fetal rat testes by light and electron microscopy have revealed that the Sertoli cells can be recognised as a distinct cell type prior to their aggregation into cords (Magre and Jost, 1980). These cells are the first testicular cell type to appear. It is widely accepted that Sertoli cells differentiate from a pool of bipotential cells (the supporting cell lineage) which in females forms the follicle cells of the ovary. The derivation of Sertoli cells and follicle cells from a common lineage is supported in part by the fact that they share certain biochemical properties including production of the Mullerian inhibitor – AMH or MIS (Vigier *et al.* 1984; Donahoe *et al.* 1987). They also both share a lineage-specific cell surface antigen, as detected by cytotoxic T cell assay (Ciccarese and Ohno, 1978). Follicle cells have the ability to 'transdifferentiate' into Sertoli cells under special circumstances, as in the ovaries of ageing or hypophysectomised female rats (Crumeyrolo-Arias *et al.* 1986) and in tissue derived from fetal ovaries grafted under the kidney capsule of adult mice (Taketo-Hosotani *et al.* 1985; Taketo-Hosotani and Sinclair-Thompson, 1987). Examination of ovotestis sections from adult XO/XY mosaic hermaphrodites (Burgoyne and Palmer, unpublished data) and of T16/XSxr hermaphrodites (Ward *et al.* 1988), has shown testis

tubules which connect smoothly with follicles (which may contain oocytes) all bounded by a continuous basement membrane.

Burgoyne *et al.* (1988a) proposed that the primary function of the testis-determining gene (*Tdy*) is the cell-autonomous diversion of the supporting cell lineage to form Sertoli cells and that the remainder of testis development is directed by these Sertoli cells. In the absence of a Y (and thus *Tdy*), the supporting cell lineage differentiates into follicle cells. This 'cell-autonomous action of *Tdy*' model of sex determination, in its simplest form, predicts that follicle cells should be exclusively XX in XX↔XY female chimaeras. This is because all supporting cells containing a Y chromosome are expected to be diverted into the Sertoli cell pathway. XY follicle cells have, however, been shown to exist in three XX↔XY female chimaeras (Ford *et al.* 1974; Burgoyne *et al.* 1988b). The latter authors suggested that these XY follicle cells could be formed by a 'timing mismatch' mechanism in which *Tdy* was pre-empted by the ovarian determination process initiated by the XX component of the chimaera. In chimaeras, there is clearly the potential for a developmental mismatch between the two components and, in Ford *et al.*'s XX↔XY females, the XY component was AKR, which other evidence suggests has a late-acting Y (Eicher and Washburn, 1986).

In this paper, we ask whether XY follicle cells can be formed in a situation where 'mismatch' can be ruled out: this is, in the ovaries of XO/XY and XO/XY/XYY mosaic hermaphrodites that occur in crosses involving BALB/cWt males (Eicher *et al.* 1980). These mosaics arise through mitotic non-disjunction of the Y,

**Table 1.** The proportion of Y-bearing cells in bone marrow and gonadal cell lineages of XO/XY and XO/XY/XYY mosaics

| Mosaic | Age (dpp) | Gonads*     |    | Percentage of Y-bearing cells (number of cells scored) |            |             |                     |            |
|--------|-----------|-------------|----|--------------------------------------------------------|------------|-------------|---------------------|------------|
|        |           | L           | R  | Bone marrow                                            | Ovary      |             | Testis or ovotestis |            |
|        |           |             |    |                                                        | Stroma     | Granulosa   | Interstitial        | Sertoli    |
| 1      | 8         | OT          | O  | 20 (30)                                                | 17 (558)   | 22 (558)    | 24 (517)            | 99 (587)   |
| 2      | 11        | O           | OT | 20 (30)                                                | 11 (552)   | 19 (633)    | 25 (551)            | 90 (535)   |
| 3      | 8         | O           | T  | 11 (28)                                                | 15 (554)   | 15 (549)    | -†                  | -†         |
| 4      | 11        | O           | OT | 20 (30)                                                | 22 (510)   | 17 (640)    | -†                  | -†         |
| 5      | 8         | T           | O  | 29 (28)‡                                               | 21 (560)   | 25 (654)    | 20 (502)            | 84 (735)   |
|        |           | Mean ± s.e. |    | 20.0 ± 2.9                                             | 17.2 ± 2.0 | 19.6 ± 1.78 | 23.0 ± 1.53         | 91.0 ± 4.4 |

\* O, ovary; T, testis; OT, ovotestis.

† Not recorded due to technical failure.

‡ 11% of the Y-bearing cells were XYY.

so there are no strain differences between the components. Furthermore, although XO fetuses with a paternal X are developmentally retarded (Burgoyne *et al.* 1983), XO fetuses with a maternal X develop as fast as their XY sibs (Thornhill and Burgoyne, unpublished data); so, on these additional grounds, we expect the XO and XY cell lines of these mosaics to be developmentally balanced.

### Materials and methods

CXBH/By females were mated to BALB/cWt males to produce XO/XY and XO/XY/XYY mosaics. The mice were killed 8–11 days after birth and examined internally for signs of hermaphroditism. A sample of bone marrow was removed from the hermaphrodites and air-dried metaphase spreads were prepared by standard methods. The gonads were fixed in 3:1 ethanol:glacial acetic acid at 4°C overnight, washed in two changes of absolute ethanol and cleared in three changes of cedarwood oil. After three changes of 58°C MP paraffin wax, they were embedded in fresh molten wax. Sections were cut at 5 µm and mounted on glycerine/albumin-coated slides.

*In situ* hybridisation was carried out according to the method of Rossant *et al.* (1986) using the probe pY353B (Bishop *et al.* 1985), which hybridises specifically to a series of repetitive sequences on the Y chromosome. The entire plasmid was labelled using the BRL (Bethesda Research Laboratories) nick translation kit and BRL Biotin-11-dUTP. Biotin residues linked to hybridised DNA was detected using streptavidin/horse radish peroxidase followed by incubation in a solution of diaminobenzidine. Positive hybridisation, identifying Y-bearing cells, was recognised by a small, discrete area of brown precipitate in the nucleus.

Estimates of Y-bearing and non-Y-bearing cells in the gonads were achieved by scoring all the cells in randomly selected tubule and follicle cross-sections or, in the case of interstitial regions, using a gridded eyepiece graticule. These estimates of relative cell numbers are subject to bias due to the amount of false negative cells that occur in tissue sections. This happens when the microtome blade passes through nuclei leaving one part with, and the other part without, the target DNA sequence. To rectify this bias, correction factors were produced by scoring control sections from ovaries in which all nuclei were Y-bearing. These ovaries were from a 2-week-old XX $\uparrow$  female mouse carrying the mutant 129  $\uparrow$  of

Lovell-Badge and Robertson (1990), which has lost *Tdy* (Gubbay *et al.* 1990).

### Results

60 litters were produced from the CXBH/By × BALB/cWt cross comprising a total of 424 mice. Of these, 300 were female, 118 were male and 6 were hermaphrodites. In addition to these six, two other hermaphrodites were found at weaning in the BALB/cWt stock. Because of technical problems with the *in situ* hybridisation, quantitative data are presented for only five of the six CXBH/BALB hermaphrodites.

Sections of ovaries from these five CXBH/BALB hermaphrodites show a number of follicle cell nuclei with positive hybridisation to the Y chromosome (Fig. 1B). XY follicle cells are clearly able to proliferate since they appear as discrete patches in the multilayered follicles of the 3-week-old BALB/cWt hermaphrodites (Fig. 1C). The overall estimate of the proportion of labelled follicle cells is almost identical to the estimated proportion of XY cells in bone marrow, and is also close to that for ovarian stroma cells (Table 1). The 'interstitial' cells in the contralateral ovotestis or testis also have a similar proportion of XY cells to the bone marrow but the Sertoli cells show a very strong bias towards the XY component (Table 1 and Fig. 1D).

### Discussion

These results demonstrate that XY follicle cells can form in the ovaries of XO/XY and XO/XY/XYY mosaic hermaphrodites. Since there are no grounds for expecting the XY component to be delayed relative to the XO component, we conclude that XY follicle cells can form even without a 'mismatch' between *Tdy* action and ovary determination. However, 'mismatch' remains the most reasonable explanation for the Ford *et al.* (1974) XX ↔ XY female chimaeras, particularly the one in which XY cells predominated and 97% of the presumed follicle cells were XY. Similar conclusions have been reached by Patek *et al.* (1991) based on an *in situ* analysis of a series of XX ↔ XY chimaeric ovaries.

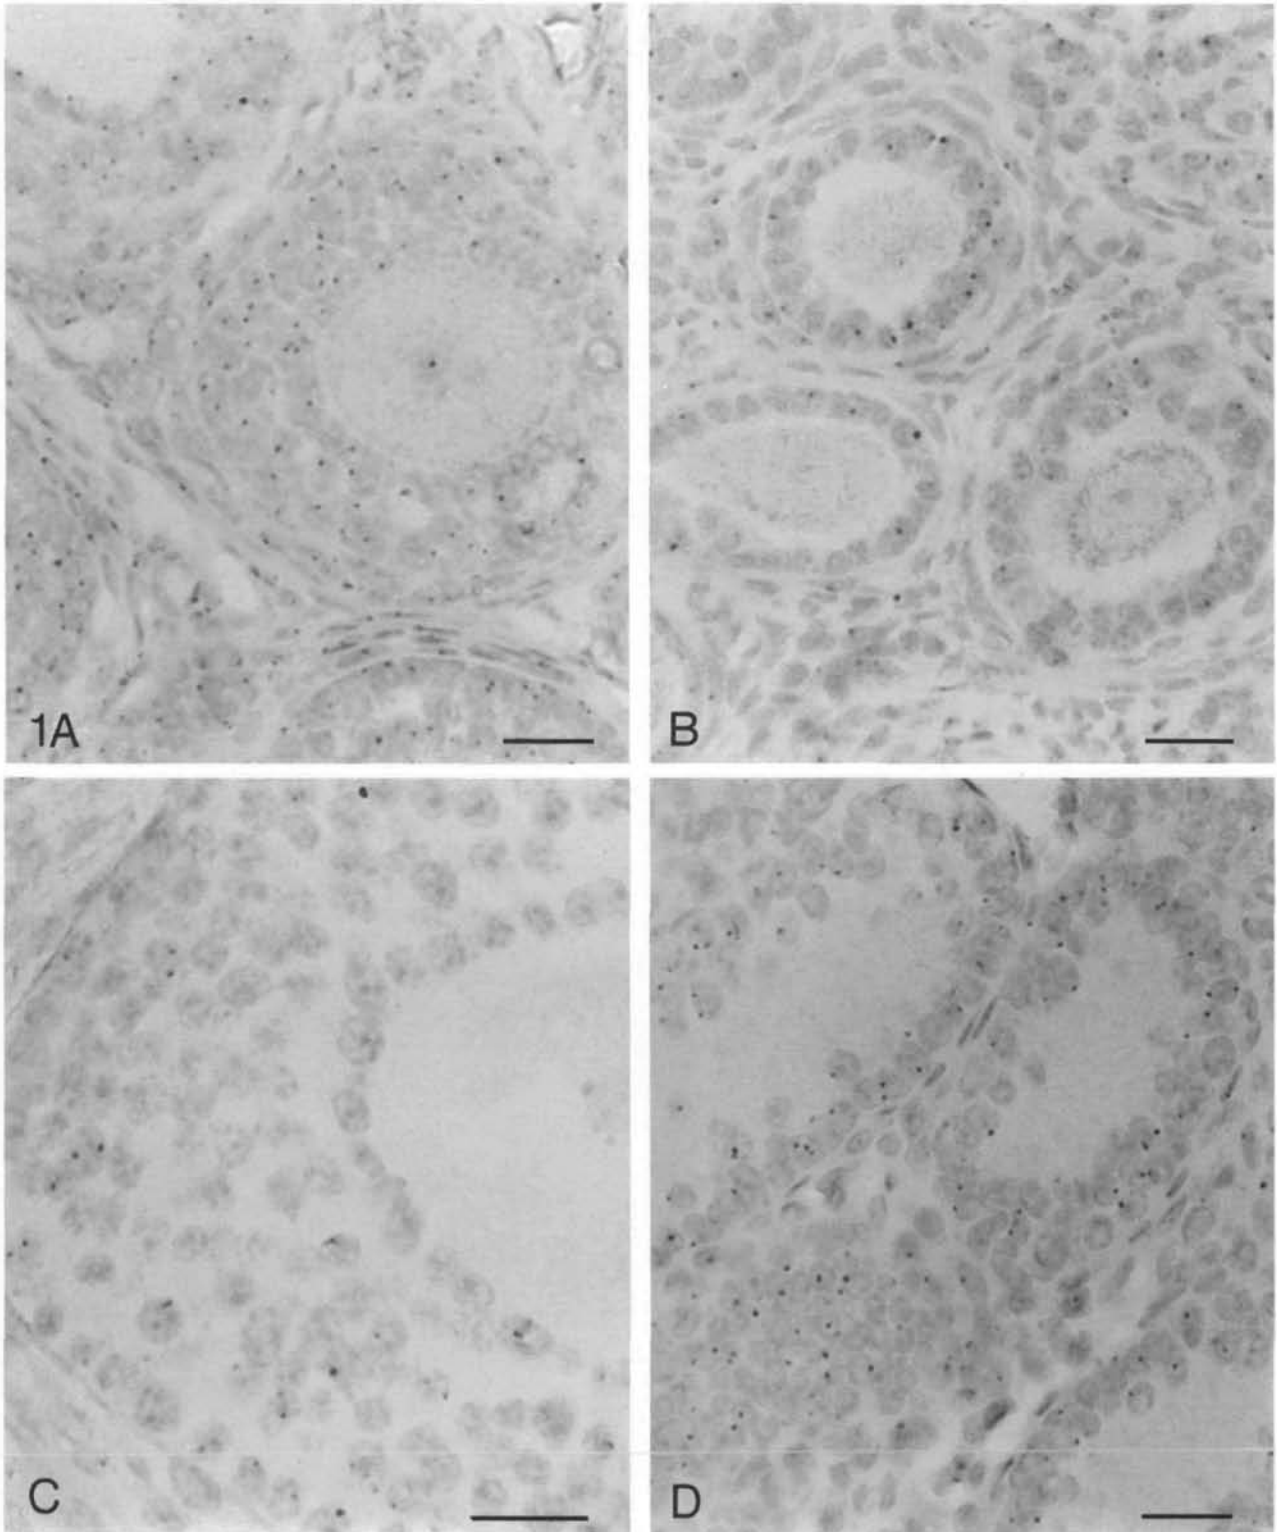

**Fig. 1.** (A) Section of ovary from a 2-week-old XXY female. Counts of labelled and unlabelled cells from these sections produced the correction factors for the mosaic ovaries. (B) Section of ovary from mosaic 5 showing three single-layered follicles, which include labelled XY follicle cells. (C) Multilayered follicle of a 3-week-old BALB/cWt mosaic ovary showing a patch of labelled XY follicle cells. (D) Testis section from mosaic 5, the contralateral gonad to the ovary shown in B. This testis had virtually no germ cells due to the high XO contribution but the Sertoli cells are nearly all XY. The patch of labelled cells that appear to be outside a tubule (bottom left) are Sertoli cells from a tangentially cut tubule. Bar, 20  $\mu\text{m}$ .

How do we account for the formation of XY follicle cells in these mosaics? In an accompanying paper, we have shown that the 'cell-autonomous action of *Tdy*' model is incorrect: XX Sertoli cells do occur in fetal, prepuberal and adult XX↔XY testes, albeit at a low frequency (Palmer and Burgoyne, 1991). The strong bias in favour of XY Sertoli cells, even in fetal XX↔XY testes (and also in the ovotestes and testes analysed here) confirms the original conclusion of Burgoyne *et al.* (1988a) that *Tdy* acts in the lineage that forms Sertoli cells, but the fact that some XX Sertoli cells are formed means that, at some point between *Tdy* expression and the formation of fetal Sertoli cell cords, there is a step that is able to recruit a few XX cells. If some XX cells can be recruited by XY cells to form Sertoli cells, could some XY cells fail to be recruited when their numbers fall below a certain threshold? If the source of the 'recruiting factor' is the XY supporting cells, it seems implausible that they fail to recruit themselves. An alternative possibility is that the XY supporting cells are triggered to form fetal Sertoli cells by the action of *Tdy* but subsequently 'transdifferentiate' into follicle cells under the influence of ovarian factors. It may be a characteristic of Sertoli cells and follicle cells that they retain the ability to transdifferentiate into the reciprocal cell type. Burgoyne (1988, 1991) has argued that the XX Sertoli cell cords that form in ovarian tissue in various situations (in all cases preceded by oocyte loss) are the result of transdifferentiation of follicle cells. Transdifferentiation of Sertoli cells to follicle cells through contact with oocytes has recently been suggested as an explanation for the occurrence of oocytes surrounded by 'granulosa-like' cells in some T16/XSxr testes (McLaren, 1991). An *in situ* Y-probe analysis of fetal XO/XY gonads might help to resolve this question.

We thank Robin Lovell-Badge for use of the mutant-Y mouse stock, Colin Bishop for providing the pY353B probe and Anne McLaren for comments on the manuscript.

## References

- BISHOP, C. E., BOURSOT, P., BARON, B., BONHOMME, F. AND HATAT, D. (1985). Most classical *Mus musculus domesticus* laboratory mouse strains carry a *Mus musculus musculus* Y Chromosome. *Nature* **315**, 70–72.
- BURGOYNE, P. S. (1988). Role of mammalian Y chromosome in sex determination. *Phil. Trans. R. Soc. Lond. B* **322**, 63–72.
- BURGOYNE, P. S. (1991). Y chromosome function in mammalian development. In *Advances in Developmental Biology* (ed. P. M. Wassarman). Greenwich, Connecticut: JAI Press Inc. (in press).
- BURGOYNE, P. S., BUEHR, M., KOOPMAN, P., ROSSANT, J. AND MCLAREN, A. (1988a). Cell-autonomous action of the testis determining gene: Sertoli cells are exclusively XY in XX↔XY chimaeric mouse testes. *Development* **102**, 443–450.
- BURGOYNE, P. S., BUEHR, M. AND MCLAREN, A. (1988b). XY follicle cells in ovaries of XX↔XY female mouse chimaeras. *Development* **104**, 683–688.
- BURGOYNE, P. S., EVANS, E. P. AND HOLLAND, K. (1983). XO monosomy is associated with reduced birthweight and lowered weight gain in the mouse. *J. Reprod. Fert.* **68**, 381–385.
- CICCARESE, S. AND OHNO, S. (1978). Two plasma membrane antigens of testicular Sertoli cells and H-2 restricted versus unrestricted lysis by female T cells. *Cell* **13**, 643–650.
- CRUMEYROLLE-ARIAS, M., ZABORSKI, P., SCHEIB, D., LATOUCHE, J. AND ASCHEIM, P. (1986). Differentiation of Sertoli-like cells in senescent ovaries of both intact and hypophysectomized rats and its relation to ovarian H-Y antigen expression. In *Modern trends in ageing research* (eds Y. Courtois, B. Fauchoux, B. Forette, D. L. Knook and J. A. Treton), vol. 147, pp. 117–120. John Libbey Eurotext Ltd.
- DONAHOE, P. K., CATE, R. L., MACLAUGHLIN, D. T., EPSTEIN, J., FULLER, A. F., TAKAHASHI, M., COUGHLIN, J. P., NINFA, E. G. AND TAYLOR, L. A. (1987). Mullerian inhibiting substance: gene structure and mechanism of action of a fetal regressor. *Rec. Prog. Horm. Res.* **43**, 431–467.
- EICHER, E. M., BEAMER, W. G., WASHBURN, L. L. AND WHITTEN, W. K. (1980). A cytogenetic investigation of inherited true hermaphroditism in BALB/cWt mice. *Cytogenet. Cell Genet.* **28**, 104–115.
- EICHER, E. M. AND WASHBURN, L. L. (1986). Genetic control of primary sex determination in mice. *A. Rev. Genet.* **20**, 327–360.
- FORD, C. E., EVANS, E. P., BURTENSHAW, M. D., CLEGG, H., BARNES, R. D. AND TUFFREY, M. (1974). Marker chromosome analysis of tetraparental AKR↔CBA-T6 mouse chimeras. *Differentiation* **2**, 321–333.
- GUBBAY, J., KOOPMAN, P., COLLIGNON, J., BURGOYNE, P. AND LOVELL-BADGE, R. (1990). Normal structure and expression of *Zfy* genes in XY female mice mutant in *Tdy*. *Development* **109**, 647–653.
- LOVELL-BADGE, R. AND ROBERTSON, E. (1990). XY female mice resulting from a heritable mutation in the murine primary testis determining gene, *Tdy*. *Development* **109**, 635–646.
- MAGRE, S. AND JOST, A. (1980). The initial phases of testicular organogenesis in the rat. An electron microscope study. *Archs Anat. microsc. Morph. exp.* **69**, 297–318.
- MCLAREN, A. (1984). Meiosis and differentiation of mouse germ cells. In *38th Symp. Soc. exp. Biol. Controlling Events in Meiosis* (eds C. W. Evans and H. G. Dickinson). Cambridge: Company of Biologists.
- MCLAREN, A. (1991). Development of the mammalian gonad: the fate of the supporting cell lineage. In *BioEssays* **13** (in press).
- PALMER, S. J. AND BURGOYNE, P. S. (1991). *In situ* analysis of fetal, prepuberal and adult XX↔XY chimaeric mouse testes: Sertoli cells are predominantly but not exclusively XY. *Development* (submitted).
- PATEK, C. E., KERR, J., GOSDEN, R., JONES, K. W., HARDY, K., MUGGLETON-HARRIS, A., HANDYSIDE, A., WHITTINGHAM, D. AND HOOPER, M. L. (1990). Sex chimaerism, fertility and sex determination in the mouse. *Development* (submitted).
- ROSSANT, J., VIJH, K. M., GROSSI, C. E. AND COOPER, M. D. (1986). Clonal origin of haematopoietic colonies in the postnatal mouse liver. *Nature* **319**, 507–511.
- TAKETO-HOSOTANI, T., MERCHANT-LARIOS, H., THAU, R. B. AND KOIDE, S. S. (1985). Testicular cell differentiation in fetal mouse ovaries following transplantation into adult male mice. *J. exp. Zool.* **236**, 229–237.
- TAKETO-HOSOTANI, T. AND SINCLAIR-THOMPSON, E. (1987). Influence of the mesonephros on the development of fetal mouse ovaries following transplantation into adult male and female mice. *Devl Biol.* **124**, 423–430.
- VIGIER, B., PICARD, J. Y., TRAN, D., LEGEAI, L. AND JOSSO, N. (1984). Production of anti-Mullerian hormone: another homology between Sertoli and granulosa cells. *Endocrinology* **114**, 1315–1320.
- WARD, H. B., BAKER, T. G. AND MCLAREN, A. (1988). A histological study of the gonads of T16H/XSxr hermaphrodite mice. *J. Anat.* **158**, 65–76.

(Accepted 11 January 1991)
